# Supplementary material for: Evaluating methods for estimating home ranges using GPS collars: A comparison using proboscis monkeys (Nasalis larvatus)
Source: PubMed Central journal article supplement (PMC5376085; doi:10.1371/journal.pone.0174891), 2017-03-31
Supplement: pone.0174891.s001.pdf [file pone.0174891.s001.pdf]

S1 Table

| <b>Individual</b> | <b>Complete</b> | <b>Simulation 1</b> | <b>Simulation 2</b> |
|-------------------|-----------------|---------------------|---------------------|
| Group 1           | 5039            | 1439                | 3461                |
| Group 2           | 3175            | 903                 | 2163                |
| Group 3           | 2311            | 665                 | 1547                |
| Group 4           | 3081            | 881                 | 2128                |
| Group 5           | 5037            | 1446                | 3440                |
| Group 6           | 1498            | 428                 | 1049                |
| Group 7           | 3309            | 948                 | 2234                |
| Group 8           | 5569            | 1591                | 3699                |
| Group 9           | 1805            | 512                 | 1279                |
| Group 10          | 2045            | 585                 | 1379                |
