# Supplementary material for: Evaluating methods for estimating home ranges using GPS collars: A comparison using proboscis monkeys (Nasalis larvatus)
Source: PubMed Central journal article supplement (PMC5376085; doi:10.1371/journal.pone.0174891), 2017-03-31
Supplement: pone.0174891.s002.pdf [file pone.0174891.s002.pdf]

S2A Table

| Individual | Max. Distance (m) | a-value (a-LoCoH) | a-value (T-LoCoH) | s-value (T-LoCoH) |
|------------|-------------------|-------------------|-------------------|-------------------|
| Group 1    | 3442              | 1620              | 690               | 0.020             |
| Group 2    | 2383              | 1250              | 730               | 0.028             |
| Group 3    | 1898              | 1480              | 580               | 0.015             |
| Group 4    | 2509              | 2500              | 560               | 0.025             |
| Group 5    | 1598              | 1640              | 760               | 0.028             |
| Group 6    | 1577              | 1470              | 750               | 0.048             |
| Group 7    | 2380              | 1150              | 740               | 0.023             |
| Group 8    | 3497              | 1000              | 640               | 0.019             |
| Group 9    | 3760              | 1060              | 1170              | 0.029             |
| Group 10   | 998               | 790               | 630               | 0.070             |

S2B Table

| Individual | a-value (a-LoCoH) |              | a-value (T-LoCoH) |              | s-value (T-LoCoH) |              |
|------------|-------------------|--------------|-------------------|--------------|-------------------|--------------|
|            | Simulation 1      | Simulation 2 | Simulation 1      | Simulation 2 | Simulation 1      | Simulation 2 |
| Group 1    | 3640              | 3170         | 1200              | 830          | 0.041             | 0.020        |
| Group 2    | 1300              | 1340         | 1270              | 870          | 0.043             | 0.024        |
| Group 3    | 1990              | 2840         | 1050              | 760          | 0.035             | 0.038        |
| Group 4    | 1260              | 2200         | 940               | 860          | 0.053             | 0.025        |
| Group 5    | 1940              | 1770         | 1130              | 1190         | 0.054             | 0.033        |
| Group 6    | 1100              | 1230         | 1230              | 1140         | 0.075             | 0.045        |
| Group 7    | 1420              | 1100         | 1260              | 1110         | 0.048             | 0.024        |
| Group 8    | 770               | 1020         | 1320              | 870          | 0.028             | 0.019        |
| Group 9    | 1270              | 1390         | 1300              | 1240         | 0.050             | 0.028        |
| Group 10   | 1390              | 920          | 1000              | 930          | 0.078             | 0.066        |
