# Supplementary material for: Evaluating methods for estimating home ranges using GPS collars: A comparison using proboscis monkeys (Nasalis larvatus)
Source: PubMed Central journal article supplement (PMC5376085; doi:10.1371/journal.pone.0174891), 2017-03-31
Supplement: pone.0174891.s003.pdf [file pone.0174891.s003.pdf]

S3 Table

| Method          | Ave. Area (ha)     | Ave. Edge Density (m/ha) | Ave. Patch Count   | Area in river (%) | AUC                |
|-----------------|--------------------|--------------------------|--------------------|-------------------|--------------------|
| <b>90%:</b> GCM | 83.05 <sup>a</sup> | 202.77 <sup>a</sup>      | 18.90 <sup>a</sup> | 5.00 <sup>a</sup> | 0.998 <sup>a</sup> |
| a-LoCoH         | 61.41 <sup>b</sup> | 134.79 <sup>b</sup>      | 2.30 <sup>b</sup>  | 0.33 <sup>b</sup> | 0.841 <sup>b</sup> |
| T-LoCoH         | 70.51 <sup>c</sup> | 122.46 <sup>b</sup>      | 1.50 <sup>b</sup>  | 0.72 <sup>b</sup> | 0.807 <sup>c</sup> |
| BRB             | 80.89 <sup>a</sup> | 108.99 <sup>b</sup>      | 5.10 <sup>c</sup>  | 2.98 <sup>c</sup> | 0.969 <sup>d</sup> |
| Chi-sq value*   | 31.22              | 31.84                    | 54.12              | 46.18             | 112.92             |
| <b>50%:</b> GCM | 50.50 <sup>A</sup> | 272.26 <sup>A</sup>      | 21.80 <sup>A</sup> | 4.64 <sup>A</sup> | -                  |
| a-LoCoH         | 15.71 <sup>B</sup> | 333.28 <sup>A</sup>      | 5.80 <sup>B</sup>  | 0.55 <sup>B</sup> | -                  |
| T-LoCoH         | 24.72 <sup>C</sup> | 192.32 <sup>B</sup>      | 2.40 <sup>C</sup>  | 0.97 <sup>B</sup> | -                  |
| BRB             | 23.20 <sup>C</sup> | 204.54 <sup>B</sup>      | 5.90 <sup>B</sup>  | 0.90 <sup>B</sup> | -                  |
| Chi-sq value*   |                    | 27.30                    | 49.62              | 36.87             | -                  |
