# Supplementary material for: Evaluating methods for estimating home ranges using GPS collars: A comparison using proboscis monkeys (Nasalis larvatus)
Source: PubMed Central journal article supplement (PMC5376085; doi:10.1371/journal.pone.0174891), 2017-03-31
Supplement: pone.0174891.s004.pdf [file pone.0174891.s004.pdf]

S4 Table.

|                   | <b>n</b> | <b>GCM: 100%</b> | <b>GCM: 90%</b> | <b>a-LoCoH</b> | <b>T-LoCoH</b> | <b>BRB</b>    |
|-------------------|----------|------------------|-----------------|----------------|----------------|---------------|
| Group 1           | 5039     | 217.00           | 167.25          | 124.67         | 144.15         | 165.49        |
| Group 2           | 3175     | 96.75            | 76.50           | 48.09          | 56.67          | 62.60         |
| Group 3           | 2311     | 69.50            | 55.50           | 37.96          | 42.22          | 49.18         |
| Group 4           | 3081     | 121.00           | 92.25           | 76.94          | 79.55          | 91.35         |
| Group 5           | 5037     | 126.50           | 112.25          | 76.24          | 82.62          | 83.42         |
| Group 6*          | 1498     | 85.25            | 62.00           | 55.78          | 60.37          | 66.95         |
| Group 7*          | 3309     | 125.25           | 87.25           | 61.33          | 74.40          | 92.88         |
| Group 8           | 5569     | 62.00            | 53.25           | 21.46          | 31.31          | 44.89         |
| Group 9*          | 1805     | 136.75           | 89.25           | 92.07          | 109.95         | 127.98        |
| Group 10*         | 2045     | 41.25            | 35.00           | 19.60          | 23.91          | 24.12         |
| Average<br>(± SE) | -        | 108.13 (15.71)   | 83.05 (11.80)   | 61.41 (10.23)  | 70.51 (11.56)  | 80.89 (13.21) |
