# Supplementary material for: Evaluating methods for estimating home ranges using GPS collars: A comparison using proboscis monkeys (Nasalis larvatus)
Source: PubMed Central journal article supplement (PMC5376085; doi:10.1371/journal.pone.0174891), 2017-03-31
Supplement: pone.0174891.s005.pdf [file pone.0174891.s005.pdf]

S5 Table

(1)

| Individual | GCM Complete | Simulation 1 | Simulation 2 |
|------------|--------------|--------------|--------------|
| Group 1    | 167.25       | 70.00        | 138.75       |
| Group 2    | 76.50        | 38.25        | 69.25        |
| Group 3    | 55.50        | 28.25        | 49.25        |
| Group 4    | 92.25        | 42.50        | 79.75        |
| Group 5    | 112.25       | 74.50        | 103.50       |
| Group 6    | 62.00        | 24.25        | 51.50        |
| Group 7    | 87.25        | 41.00        | 71.25        |
| Group 8    | 53.25        | 37.75        | 48.25        |
| Group 9    | 89.25        | 27.50        | 67.75        |
| Group 10   | 35.00        | 23.25        | 32.25        |

(3)

| Individual | T-LoCoH Complete | Simulation 1 | Simulation 2 |
|------------|------------------|--------------|--------------|
| Group 1    | 144.15           | 156.66       | 146.67       |
| Group 2    | 56.67            | 56.61        | 58.90        |
| Group 3    | 42.22            | 42.91        | 44.18        |
| Group 4    | 79.55            | 83.29        | 87.17        |
| Group 5    | 82.62            | 84.86        | 86.59        |
| Group 6    | 60.37            | 64.02        | 62.84        |
| Group 7    | 74.40            | 78.55        | 80.66        |
| Group 8    | 31.31            | 42.55        | 32.71        |
| Group 9    | 109.95           | 105.51       | 104.27       |
| Group 10   | 23.91            | 22.83        | 25.28        |

(2)

| Individual | a-LoCoH Complete | Simulation 1 | Simulation 2 |
|------------|------------------|--------------|--------------|
| Group 1    | 124.67           | 128.60       | 133.17       |
| Group 2    | 48.09            | 44.69        | 47.48        |
| Group 3    | 37.96            | 34.55        | 41.24        |
| Group 4    | 76.94            | 74.86        | 74.74        |
| Group 5    | 76.24            | 75.95        | 78.00        |
| Group 6    | 55.78            | 47.73        | 50.85        |
| Group 7    | 61.33            | 59.40        | 61.46        |
| Group 8    | 21.46            | 19.99        | 20.96        |
| Group 9    | 92.07            | 85.87        | 95.22        |
| Group 10   | 19.60            | 18.58        | 19.97        |

(4)

| Individual | BRB Complete | Simulation 1 | Simulation 2 |
|------------|--------------|--------------|--------------|
| Group 1    | 165.49       | 227.55       | 164.02       |
| Group 2    | 62.60        | 89.10        | 62.99        |
| Group 3    | 49.18        | 67.83        | 49.52        |
| Group 4    | 91.35        | 119.58       | 90.22        |
| Group 5    | 83.42        | 100.53       | 83.99        |
| Group 6    | 66.95        | 80.07        | 66.24        |
| Group 7    | 92.88        | 190.64       | 95.71        |
| Group 8    | 44.89        | 127.36       | 52.36        |
| Group 9    | 127.98       | 188.44       | 123.47       |
| Group 10   | 24.12        | 34.21        | 23.96        |
