# Supplementary material for: Evaluating methods for estimating home ranges using GPS collars: A comparison using proboscis monkeys (Nasalis larvatus)
Source: PubMed Central journal article supplement (PMC5376085; doi:10.1371/journal.pone.0174891), 2017-03-31
Supplement: pone.0174891.s006.pdf [file pone.0174891.s006.pdf]

S6 Table

| Simulation               | Ave. Area (ha)     | Ave. Edge Density (m/ha) | Ave. Patch Count  | Area in river (%) | Point Inclusion (%)  |
|--------------------------|--------------------|--------------------------|-------------------|-------------------|----------------------|
| <i>GCM: Complete</i>     | 50.50 <sup>a</sup> | 272.26 <sup>a</sup>      | 21.80             | 4.64              | 84.34 <sup>a</sup>   |
| Simulation 1             | 27.00 <sup>b</sup> | 468.10 <sup>b</sup>      | 26.60             | 6.48              | 74.08 <sup>b</sup>   |
| Simulation 2             | 39.95 <sup>c</sup> | 320.88 <sup>a</sup>      | 25.30             | 4.37              | 78.87 <sup>a,b</sup> |
| <i>a-LoCoH: Complete</i> | 15.71              | 333.28                   | 5.80              | 0.55              | 49.49                |
| Simulation 1             | 13.65              | 294.19                   | 3.90              | 0.87              | 47.83                |
| Simulation 2             | 16.12              | 300.95                   | 5.30              | 0.47              | 49.07                |
| <i>T-LoCoH: Complete</i> | 24.72              | 192.32                   | 2.40              | 0.97              | 51.43                |
| Simulation 1             | 27.11              | 143.99                   | 1.60              | 1.21              | 51.72                |
| Simulation 2             | 26.80              | 153.15                   | 1.80              | 0.76              | 51.04                |
| <i>BRB: Complete</i>     | 23.20 <sup>a</sup> | 204.54 <sup>a</sup>      | 5.90 <sup>a</sup> | 0.90              | 56.61                |
| Simulation 1             | 31.01 <sup>b</sup> | 114.97 <sup>b</sup>      | 2.30 <sup>b</sup> | 2.29              | 58.68                |
| Simulation 2             | 23.00 <sup>a</sup> | 208.70 <sup>a</sup>      | 6.70 <sup>a</sup> | 0.82              | 56.36                |
| Chi-sq value*            | 219.49             | 169.36                   | 188.67            | 105.19            | 270.05               |
